# Supplementary material
Source: publisher figshare collection journal article supplement (https://gsapubs.figshare.com/ndownloader/files/22741676)
Supplement: Supplementary file 1 [file 22741676]

GSA Data Repository Item # 9022

Title of article A Fluid Inclusion Technique for Determining Maximum  
Temperature in Calcite and its Comparison to the Vitrinite Reflectance

Geothermometer

Author(s) Charles E. Barker and Robert H. Goldstein

see Geology v. 18, p. 1003 - 1006

### Contents

(14 pages)  
\_\_\_\_\_  
\_\_\_\_\_  
\_\_\_\_\_  
\_\_\_\_\_  
\_\_\_\_\_  
\_\_\_\_\_  
\_\_\_\_\_  
\_\_\_\_\_  
\_\_\_\_\_

Geological Society of America  
Supplementary Material 90-

To Accompany

A FLUID INCLUSION TECHNIQUE FOR DETERMINING MAXIMUM TEMPERATURE IN CALCITE AND  
ITS COMPARISON TO THE VITRINITE REFLECTANCE GEOTHERMOMETER

by Charles E. Barker and Robert H. Goldstein

METHODS

In our samples, the fluid inclusion homogenization temperatures ( $T_h$ ) were measured from calcite on a Fluid Inc.-adapted, USGS-designed, gas-flow heating and freezing stage. Established stage calibration procedures (Roedder, 1984; Shepard et al., 1985) were followed. All of our samples were prepared using techniques to prevent overheating. Inclusions were heated and homogenized to liquid (overheating avoided) before freezing them for salinity measurements. We cannot assure that such precautions against altering  $T_h$  were taken in the published data, however, most of the published data come from samples that reached greater than 100°C during burial, so that minor heating during sample preparation would not influence the results. The published data were not used if the sample were frozen before heating to  $T_h$  (Lawler and Crawford, 1983). The  $T_h$  data were not corrected for pressure.

If necessary, dispersed sedimentary organic matter (OM) in our rock samples was concentrated by crushing and sink-float isolation. Coal samples were crushed only. The crushed OM or coal was mixed with epoxy, and polished. Reflectance of the polished samples was measured using standard procedures (Stach et al., 1982; Bustin et al., 1983).

In our sample suite, we used mostly  $T_h$  and  $R_m$  data from samples that were in close association with each other (ideally the same sample). In some cases, if a well-constrained value could be interpolated from adjacent sample data, the case was used. For instance, if the fluid inclusion data were the result of a regional event, in a structurally simple area, then a well constrained regional  $R_m$  or other coal rank value would be used. In structurally complex areas, only a  $R_m$  value from the same structural block as the  $T_h$  data would be used. In hydrothermal deposits or vein samples which may not have been in equilibrium with the regional temperature, only a  $R_m$  value from the deposit itself would be used. In difficult samples (primarily those from Sacramento Mountains and northwest Kansas), duplicate measurements of  $R_m$  were run to assess operator bias in the data. If a difference of over 10 percent or so exists between the  $R_m$  values, then Rock-Eval pyrolysis  $T_{max}$  data converted to a  $R_m$  equivalent (VRE) measure, was used to indicate the more probable  $R_m$  value by its proximity to one of the measured  $R_m$  values.

The present peak temperature from which samples were collected,  $T_h$ , and/or  $R_m$  values are compiled for subsurface systems interpreted to be at peak temperature ( $T_{peak}$ ). The present  $T_{peak}$  is computed from bottom hole temperature derived from logs, measured after equilibration of the well, or calculated using a locally determined geothermal gradient and mean surface temperature. In several cases, the bottom-hole temperatures (BHT) were approximately converted to formation temperature using the American Association of Petroleum Geologists (1976) generalized correction for North America. This correction was applied as a statistical correction (see review by Barker, 1989b) to these data to make them more conformable to the equilibrium formation temperature data usually available. Scott (1982) estimated the AAPG correction has a root mean square error of 10°C in correcting the BHT to equilibrium formation temperature.

To determine the relationship of  $T_h$  to present  $T_{peak}$ , we compiled the mean ( $T_{hmean}$ ), and the highest temperature mode for polymodal distributions, or the single mode for unimodal distributions ( $T_{hmode}$ ). However, both statistics were not available for some studies, so in some cases we substituted  $T_{hmean}$  for  $T_{hmode}$  in the regression analyses (as noted in the table).

| Locality, Country,<br>Description<br>(Reference)                                                                        | Depth<br>(km)                                        | Rm<br>mean<br>(%)                                  | Th<br>mean<br>(°C)                                   | Th<br>mode<br>(°C)                            | Th<br>range<br>low/high<br>(°C)                                                                                                                                      | Timing of<br>Inclusions<br>Relative<br>to Tpeak                           | Present<br>T if at<br>Tpeak<br>(°C)                                          | Functional<br>Heating<br>Duration<br>(yr)                                                                                                                                                                                           | Inclusion<br>Petrography<br>/<br>Host Mineral                        |
|-------------------------------------------------------------------------------------------------------------------------|------------------------------------------------------|----------------------------------------------------|------------------------------------------------------|-----------------------------------------------|----------------------------------------------------------------------------------------------------------------------------------------------------------------------|---------------------------------------------------------------------------|------------------------------------------------------------------------------|-------------------------------------------------------------------------------------------------------------------------------------------------------------------------------------------------------------------------------------|----------------------------------------------------------------------|
| <b>ACTIVE GEOTHERMAL SYSTEMS</b>                                                                                        |                                                      |                                                    |                                                      |                                               |                                                                                                                                                                      |                                                                           |                                                                              |                                                                                                                                                                                                                                     |                                                                      |
| East Mesa, USA,<br>well Mesa 6-2<br>(Th-Hoagland and<br>Elders, 1977) <sup>g</sup><br>(Rm-this paper)                   | 1.13<br>1.08                                         | 1.7<br>1.6                                         | 196<br>215                                           | 222<br>208                                    | <sup>d</sup> 165-240<br>207-245                                                                                                                                      | near peak <sup>b</sup><br>near peak?                                      | N/A<br>N/A                                                                   | <10 <sup>6</sup> <sup>g</sup><br><10 <sup>6</sup>                                                                                                                                                                                   | Origin unknown/<br>calcite veins                                     |
| East Mesa, USA,<br>well Mesa 31-1.<br>(Th-Miller, 1980)<br>(Rm-this paper)                                              | 1.36<br>1.71<br>1.72<br>1.88                         | 0.8<br>1.1 <sup>n</sup><br>1.1 <sup>n</sup><br>0.8 | <u>155</u><br><u>153</u><br><u>147</u><br><u>161</u> | N/A<br>N/A<br>N/A<br>N/A                      | 135-160<br>140-180<br>135-175<br>140-180                                                                                                                             | near peak<br>near peak<br>near peak<br>near peak                          | 144<br>153<br>155<br>158                                                     | <10 <sup>6</sup> <sup>g</sup><br><10 <sup>6</sup> <sup>g</sup><br><10 <sup>6</sup> <sup>g</sup><br><10 <sup>6</sup> <sup>g</sup>                                                                                                    | Origin unknown/<br>calcite veins<br>as above<br>as above<br>as above |
| Heber, USA,<br>well Holtz-1.<br>(Th-Browne, 1977)<br>(Rm-this paper)                                                    | 0.48<br>0.79<br>0.92<br>1.22<br>1.26<br>1.34<br>1.52 | 1.6<br>1.8<br>1.7<br>1.9<br>1.95<br>1.9<br>2.0     | 170<br>185<br>201<br>210<br>196<br>190<br>215        | 175<br>190<br>200<br>220<br>210<br>195<br>235 | <sup>d</sup> 150-190<br><sup>d</sup> 170-200<br><sup>d</sup> 150-225<br><sup>d</sup> 190-225<br><sup>d</sup> 175-220<br><sup>d</sup> 175-205<br><sup>d</sup> 180-265 | at peak<br>at peak<br>at peak<br>at peak<br>at peak<br>at peak<br>at peak | N/A<br>N/A<br>N/A<br>N/A<br>N/A<br>N/A<br>N/A                                | <10 <sup>6</sup> <sup>g</sup><br><10 <sup>6</sup> <sup>g</sup><br><10 <sup>6</sup> <sup>g</sup><br><10 <sup>6</sup> <sup>g</sup><br><10 <sup>6</sup> <sup>g</sup><br><10 <sup>6</sup> <sup>g</sup><br><10 <sup>6</sup> <sup>g</sup> | Origin unknown<br>calcite chips<br>as above<br>as above<br>as above  |
| Cerro Prieto, Mexico,<br>well M-84.<br>(Th-Elders et al.,<br>1978) <sup>g</sup><br>(Rm-Barker, 1979,<br>and this paper) | 1.28<br>1.32<br>1.39<br>1.64                         | 3.2<br>3.5<br>3.2<br>3.8                           | <u>316</u><br><u>296</u><br><u>312</u><br><u>324</u> | N/A<br>N/A<br>N/A<br>N/A                      | 300-325<br>258-308<br>307-323<br>322-327                                                                                                                             | early?<br>early?<br>early?<br>early?                                      | 320 <sup>j</sup><br>324 <sup>j</sup><br>328 <sup>j</sup><br>343 <sup>j</sup> | 10 <sup>4</sup> <sup>g</sup><br>10 <sup>4</sup> <sup>g</sup><br>10 <sup>4</sup> <sup>g</sup><br>10 <sup>4</sup> <sup>g</sup>                                                                                                        | Origin unknown/<br>calcite chips<br>as above<br>as above<br>as above |
| As above, well M-9                                                                                                      | 0.9                                                  | 1.6                                                | 154                                                  | 154                                           | 154 (n=1)                                                                                                                                                            | early?                                                                    | 234 <sup>j</sup>                                                             | 10 <sup>4</sup> <sup>g</sup>                                                                                                                                                                                                        | as above                                                             |
| As above, well M-10                                                                                                     | 1.19                                                 | 2.7                                                | 290                                                  | N/A                                           | 271-311                                                                                                                                                              | near peak                                                                 | 290 <sup>j</sup>                                                             | 10 <sup>4</sup> <sup>g</sup>                                                                                                                                                                                                        | as above                                                             |
| As above, well M-51                                                                                                     | 1.56                                                 | 3.7                                                | 319                                                  | N/A                                           | N/A                                                                                                                                                                  | near peak                                                                 | 327 <sup>j</sup>                                                             | 10 <sup>4</sup> <sup>g</sup>                                                                                                                                                                                                        | as above                                                             |
| As above, well M-53                                                                                                     | 1.81                                                 | 3.6                                                | 321                                                  | N/A                                           | 316-337                                                                                                                                                              | near peak                                                                 | 332 <sup>j</sup>                                                             | 10 <sup>4</sup> <sup>g</sup>                                                                                                                                                                                                        | as above                                                             |
| As above, well M-53                                                                                                     | 1.82                                                 | 3.6                                                | 350                                                  | N/A                                           | 305-375                                                                                                                                                              | near peak                                                                 | 332 <sup>j</sup>                                                             | 10 <sup>4</sup> <sup>g</sup>                                                                                                                                                                                                        | as above                                                             |
| As above, well M-53                                                                                                     | 1.96                                                 | 3.6                                                | <u>324</u>                                           | N/A                                           | 304-346                                                                                                                                                              | near peak                                                                 | 336 <sup>j</sup>                                                             | 10 <sup>4</sup> <sup>g</sup>                                                                                                                                                                                                        | as above                                                             |
| As above, well M-90                                                                                                     | 1.09                                                 | 1.5 <sup>o</sup>                                   | <u>274</u>                                           | N/A                                           | 274 (n=2)                                                                                                                                                            | near peak                                                                 | 311 <sup>j</sup>                                                             | 10 <sup>4</sup> <sup>g</sup>                                                                                                                                                                                                        | as above                                                             |
| As above, well M-90                                                                                                     | 1.15                                                 | 2.0 <sup>o</sup>                                   | <u>315</u>                                           | N/A                                           | 312-317                                                                                                                                                              | near peak                                                                 | 312 <sup>j</sup>                                                             | 10 <sup>4</sup> <sup>g</sup>                                                                                                                                                                                                        | as above                                                             |
| As above, well M-90                                                                                                     | 1.29                                                 | 3.1 <sup>o</sup>                                   | <u>256</u>                                           | N/A                                           | 247-258                                                                                                                                                              | near peak                                                                 | 303 <sup>j</sup>                                                             | 10 <sup>4</sup> <sup>g</sup>                                                                                                                                                                                                        | as above                                                             |
| As above, well M-90                                                                                                     | 1.32                                                 | 3.1 <sup>o</sup>                                   | <u>280</u>                                           | N/A                                           | 268-286                                                                                                                                                              | near peak                                                                 | 301 <sup>j</sup>                                                             | 10 <sup>4</sup> <sup>g</sup>                                                                                                                                                                                                        | as above                                                             |
| As above, well M-90                                                                                                     | 1.35                                                 | 3.4 <sup>o</sup>                                   | <u>292</u>                                           | N/A                                           | 280-311                                                                                                                                                              | near peak                                                                 | 308 <sup>j</sup>                                                             | 10 <sup>4</sup> <sup>g</sup>                                                                                                                                                                                                        | as above                                                             |
| As above, well M-91                                                                                                     | 1.37                                                 | 1.3                                                | <u>259</u>                                           | N/A                                           | 254-267                                                                                                                                                              | near peak                                                                 | 322 <sup>j</sup>                                                             | 10 <sup>4</sup> <sup>g</sup>                                                                                                                                                                                                        | as above                                                             |
| As above, well M-91                                                                                                     | 1.64                                                 | 1.6                                                | <u>246</u>                                           | 254                                           | 231-263                                                                                                                                                              | near peak                                                                 | N/A                                                                          | 10 <sup>4</sup> <sup>g</sup>                                                                                                                                                                                                        | as above                                                             |
| As above, well M-91                                                                                                     | 1.72                                                 | 1.5                                                | <u>271</u>                                           | N/A                                           | 261-303                                                                                                                                                              | near peak                                                                 | 326 <sup>j</sup>                                                             | 10 <sup>4</sup> <sup>g</sup>                                                                                                                                                                                                        | as above                                                             |
| As above, well M-91                                                                                                     | 1.80                                                 | 2.1 <sup>n</sup>                                   | <u>283</u>                                           | N/A                                           | 243-345                                                                                                                                                              | near peak                                                                 | 327 <sup>j</sup>                                                             | 10 <sup>4</sup> <sup>g</sup>                                                                                                                                                                                                        | as above                                                             |
| As above, well M-94                                                                                                     | 1.30                                                 | 2.2                                                | <u>225</u>                                           | N/A                                           | 148-275                                                                                                                                                              | near peak                                                                 | ---                                                                          | 10 <sup>4</sup> <sup>g</sup>                                                                                                                                                                                                        | as above                                                             |

| Locality, Country,<br>Description<br>(Reference)                                                                   | Depth<br>(km) | Rm<br>mean<br>(%) | Th<br>mean<br>(°C) | Th<br>mode<br>(°C) | Th<br>range<br>low/high<br>(°C) | Timing of<br>Inclusions<br>Relative<br>to Tpeak | Present<br>T if at<br>Tpeak<br>(°C) | Functional<br>Heating<br>Duration<br>(yr) | Inclusion<br>Petrography<br>/<br>Host Mineral |
|--------------------------------------------------------------------------------------------------------------------|---------------|-------------------|--------------------|--------------------|---------------------------------|-------------------------------------------------|-------------------------------------|-------------------------------------------|-----------------------------------------------|
| <b>Cerro Prieto, Mexico,</b><br><b>well M-84,</b><br>(Th-Sterner, 1985)<br>(Rm-Barker, 1979)                       | 1.06          | 2.6               | 242                | 255 <u>d</u>       | 220-280                         | early?                                          | 240 <u>j</u>                        | 10 <sup>4</sup> <u>g</u>                  | Origin unknown/<br>calcite cement             |
|                                                                                                                    | 1.1           | 3.0               | 300                | 300 <u>d</u>       | 290-305                         | early?                                          | 306 <u>j</u>                        | 10 <sup>4</sup> <u>g</u>                  | as above                                      |
|                                                                                                                    | 1.17          | 3.0               | 290                | 295 <u>d</u>       | 265-305                         | early?                                          | 312 <u>j</u>                        | 10 <sup>4</sup> <u>g</u>                  | as above                                      |
|                                                                                                                    | 1.19          | 3.2               | 308                | 305 <u>d</u>       | 270-310                         | early?                                          | 314 <u>j</u>                        | 10 <sup>4</sup> <u>g</u>                  | as above                                      |
|                                                                                                                    | 1.31          | 3.5               | 309                | 320 <u>d</u>       | 280-325                         | early?                                          | 322 <u>j</u>                        | 10 <sup>4</sup> <u>g</u>                  | as above                                      |
|                                                                                                                    | 1.4           | 3.2               | 320                | 320                | 310-330                         | early?                                          | 328 <u>j</u>                        | 10 <sup>4</sup> <u>g</u>                  | as above                                      |
|                                                                                                                    | 1.67          | 3.8               | 347                | 347                | 340-355                         | early?                                          | 345 <u>j</u>                        | 10 <sup>4</sup> <u>g</u>                  | as above                                      |
| <b>Cerro Prieto, Mexico</b><br><b>well M-9.</b><br>(Th-Sterner, 1985)<br>(Rm-this paper)                           | 0.68          | 1.3               | 181                | 203 <u>d</u>       | 165-215                         | early?                                          | 196 <u>j</u>                        | 10 <sup>4</sup> <u>g</u>                  | Origin unknown/<br>calcite cement             |
|                                                                                                                    | 0.83          | 1.55              | 238                | 238 <u>d</u>       | 230-245                         | early?                                          | 250 <u>j</u>                        | 10 <sup>4</sup> <u>g</u>                  | as above                                      |
|                                                                                                                    | 0.90          | 1.7               | 208                | 221 <u>d</u>       | 180-230                         | early?                                          | 249 <u>j</u>                        | 10 <sup>4</sup> <u>g</u>                  | as above                                      |
|                                                                                                                    | 1.01          | 2.1               | 260                | 260                | 255-270                         | early?                                          | 248 <u>j</u>                        | 10 <sup>4</sup> <u>g</u>                  | as above                                      |
|                                                                                                                    | 1.09          | 2.35              | 230                | 230 <u>d</u>       | 230(n=1)                        | early?                                          | 248 <u>j</u>                        | 10 <sup>4</sup> <u>g</u>                  | as above                                      |
|                                                                                                                    | 1.31          | 2.7               | 264                | 283 <u>d</u>       | 205-290                         | early?                                          | 248 <u>j</u>                        | 10 <sup>4</sup> <u>g</u>                  | as above                                      |
|                                                                                                                    | 1.36          | 2.6               | 241                | 295 <u>d</u>       | 185-305                         | early?                                          | 247 <u>j</u>                        | 10 <sup>4</sup> <u>g</u>                  | as above                                      |
| <b>Cerro Prieto, Mexico</b><br><b>well M-94.</b><br>(Th-Sanford, 1981)<br>(Rm-Barker, 1979)                        | 1.22          | 0.6               | <u>198</u>         | N/A                | 140-300                         | near peak                                       |                                     | 10 <sup>4</sup> <u>g</u>                  | Origin unknown/<br>calcite cement             |
|                                                                                                                    | 1.29          | 2.2               | <u>250</u>         | N/A                | 245-255                         | near peak                                       |                                     | 10 <sup>4</sup> <u>g</u>                  | as above                                      |
|                                                                                                                    | 1.60          | 2.2               | <u>258</u>         | N/A                | 225-265                         | near peak                                       |                                     | 10 <sup>4</sup> <u>g</u>                  | as above                                      |
| <b>well T-366</b><br>(Th-Sanford, 1981)<br>(Rm-this paper)                                                         | 2.0           | 1.65              | <u>208</u>         | N/A                | 190-230                         | near peak                                       |                                     | 10 <sup>4</sup> <u>g</u>                  | as above                                      |
| <b>Salton Sea, USA,</b><br><b>well Sinclair-4.</b><br>(Th and Tpeak<br>Freckman, 1978) <u>g</u><br>(Rm-this paper) | 1.03          | 2.2               | 255                | 272 <u>d</u>       | 227-275                         | near peak                                       | 238 <u>j</u>                        | 10 <sup>4</sup> <u>g</u>                  | Origin unknown/<br>calcite chips              |
|                                                                                                                    | 1.06          | 2.2               | 238                | 256 <u>d</u>       | 195-265                         | near peak                                       | 242 <u>j</u>                        | 10 <sup>4</sup> <u>g</u>                  | as above                                      |
|                                                                                                                    | 1.08          | 2.3               | 263                | 263                | 257-269                         | near peak                                       | 249 <u>j</u>                        | 10 <sup>4</sup> <u>g</u>                  | as above                                      |
|                                                                                                                    | 1.21          | 2.3               | 206                | 209                | 201-209                         | near peak                                       | 257 <u>j</u>                        | 10 <sup>4</sup> <u>g</u>                  | as above                                      |
|                                                                                                                    | 1.27          | 2.5               | 260                | 260                | 243-275                         | near peak                                       | 265 <u>j</u>                        | 10 <sup>4</sup> <u>g</u>                  | as above                                      |
|                                                                                                                    | 1.32          | 2.2               | 256                | 258                | 249-263                         | near peak                                       | 270 <u>j</u>                        | 10 <sup>4</sup> <u>g</u>                  | as above                                      |
|                                                                                                                    | 1.35          | 2.6               | 262                | 260                | 235-283                         | near peak                                       | 272 <u>j</u>                        | 10 <sup>4</sup> <u>g</u>                  | as above                                      |
|                                                                                                                    | 1.37          | 2.3               | 252                | 278                | 227-287                         | near peak                                       | 276 <u>j</u>                        | 10 <sup>4</sup> <u>g</u>                  | as above                                      |
|                                                                                                                    | 1.40          | 2.75 <u>n</u>     | 268                | 274                | 245-290                         | near peak                                       | 278 <u>j</u>                        | 10 <sup>4</sup> <u>g</u>                  | as above                                      |
|                                                                                                                    | 1.43          | 2.75              | 278                | 278                | 275-281                         | near peak                                       | 279 <u>j</u>                        | 10 <sup>4</sup> <u>g</u>                  | as above                                      |
|                                                                                                                    | 1.44          | 2.8               | 247                | 248                | 210-269                         | near peak                                       | 280 <u>j</u>                        | 10 <sup>4</sup> <u>g</u>                  | as above                                      |
|                                                                                                                    | 1.45          | 2.9               | 263                | 272 <u>d</u>       | 255-278                         | near peak                                       | 281 <u>j</u>                        | 10 <sup>4</sup> <u>g</u>                  | as above                                      |
|                                                                                                                    | 1.51          | 3.0 <u>n</u>      | 265                | 266                | 263-271                         | near peak                                       | 288 <u>j</u>                        | 10 <sup>4</sup> <u>g</u>                  | as above                                      |
|                                                                                                                    | 1.54          | 3.0 <u>n</u>      | 276                | 272 <u>d</u>       | 263-291                         | near peak                                       | 291 <u>j</u>                        | 10 <sup>4</sup> <u>g</u>                  | as above                                      |
|                                                                                                                    | 1.58          | 3.0               | 279                | 282 <u>d</u>       | 269-285                         | near peak                                       | 292 <u>j</u>                        | 10 <sup>4</sup> <u>g</u>                  | as above                                      |

| Locality, Country,<br>Description<br>(Reference)                                                          | Depth<br>(km) | Rm<br>mean<br>(%) | Th<br>mean<br>(°C) | Th<br>mode<br>(°C) | Th<br>range<br>low/high<br>(°C) | Timing of<br>Inclusions<br>Relative<br>to Tpeak | Present<br>T if at<br>Tpeak<br>(°C) | Functional<br>Heating<br>Duration<br>(yr) | Inclusion<br>Petrography<br>/<br>Host Mineral |
|-----------------------------------------------------------------------------------------------------------|---------------|-------------------|--------------------|--------------------|---------------------------------|-------------------------------------------------|-------------------------------------|-------------------------------------------|-----------------------------------------------|
| Salton Sea, USA,<br>well Magmamax-2.<br>(Th and Tpeak-<br>Freckman, 1978) <sup>g</sup><br>(Rm-this paper) | 0.82          | 2.3               | 303                | N/A                | 286-315                         | near peak                                       | 290 <sup>j</sup>                    | 10 <sup>4</sup> <sup>g</sup>              | as above                                      |
| Raft River, USA,<br>well RRGE-2.<br>(Th, Rm-this paper)                                                   | 1.33          | 1.5               | 133                | 145                | 120-148                         | near peak                                       | 149 <sup>j</sup>                    | 10 <sup>6</sup> <sup>g</sup>              | Primaries <sup>a</sup> /<br>vein calcite      |
| Guaymas Basin,<br>Gulf of California,<br>Outcrop.<br>(Th, Tp-Peter and<br>Scott, 1988)                    | 2.0           | N/A               | 225                | 251                | 198-262                         | at peak                                         | 273                                 | --                                        | Primaries/<br>calcite cement                  |
| <b>EXTINCT GEOTHERMAL SYSTEMS</b>                                                                         |               |                   |                    |                    |                                 |                                                 |                                     |                                           |                                               |
| Gaspe, Canada,<br>Outcrop.<br>(Duba and<br>Williams-Jones,<br>1983)                                       | 0             | 4.6               | 301                | 300                | 260-360                         | early?                                          | --                                  | <10 <sup>6</sup> <sup>c</sup>             | Primaries/<br><br>vein calcite                |
| Point Delgada, USA,<br>Outcrop.<br>(Blake et al., 1988)<br>(McLaughlin<br>et al., 1985)                   | 0             | 2.5               | 254                | 250                | 246-288                         | at peak <sup>b</sup>                            | --                                  | <10 <sup>6</sup> <sup>c</sup>             | Origin Unknown/<br>early vein<br>calcite      |
| Benue Trough,<br>Nigeria, Outcrop<br>(Th-Nwachukwu, 1975)<br>(VRE-Simpson, 1954;<br>Nwachukwu, 1985)      | 0             | 0.8               | N/A                | 103                | 40-240                          | early?                                          | --                                  | 2x10 <sup>6</sup> <sup>f</sup>            | Various origins/<br>calcite vein              |
| Fore-Sudetic<br>Monocline, Poland,<br>Wells.<br>(Th-Specik and<br>Kozlowski, 1987)<br>(Rm-Speczik, 1988)  | 4.94<br>2.31  | 1.9<br>2.3        | 193?<br>212?       | 205?<br>220?       | 180-205<br>204-220              | early?<br>early?                                | --<br>--                            | --<br>--                                  | Various origins/<br>Calcite veins             |

| Locality, Country,<br>Description<br>(Reference) | Depth<br>(km) | Rm<br>mean<br>(%) | Th<br>mean<br>(°C) | Th<br>mode<br>(°C) | Th<br>range<br>low/high<br>(°C) | Timing of<br>Inclusions<br>Relative<br>to Tpeak | Present<br>T if at<br>Tpeak<br>(°C) | Functional<br>Heating<br>Duration<br>(yr) | Inclusion<br>Petrography<br>/<br>Host Mineral |
|--------------------------------------------------|---------------|-------------------|--------------------|--------------------|---------------------------------|-------------------------------------------------|-------------------------------------|-------------------------------------------|-----------------------------------------------|
|--------------------------------------------------|---------------|-------------------|--------------------|--------------------|---------------------------------|-------------------------------------------------|-------------------------------------|-------------------------------------------|-----------------------------------------------|

# BURIAL DIAGENESIS

## **Smackover Formation**

### **Mount Vernon Field,**

|                                                                  |      |     |    |    |        |       |                  |                               |                              |
|------------------------------------------------------------------|------|-----|----|----|--------|-------|------------------|-------------------------------|------------------------------|
| USA, wells.<br>(Th, Tp-Klosterman,<br>1981a, 1981b)              | 2.40 | 0.6 | 90 | 80 | 58-136 | early | 94 $\frac{i}{-}$ | 10 <sup>6</sup> $\frac{f}{-}$ | Primaries/<br>calcite cement |
| (VRE-Claypool and<br>Mancini, 1989;<br>Nunn and<br>Sassen, 1986) | 2.42 | 0.6 | 87 | 80 | 58-136 | early | 95 $\frac{i}{-}$ | 10 <sup>6</sup> $\frac{f}{-}$ | as above                     |
|                                                                  | 2.42 | 0.6 | 85 | 80 | 58-136 | early | 95 $\frac{i}{-}$ | 10 <sup>6</sup> $\frac{f}{-}$ | as above                     |

### **Walker Creek Field,**

|                                                     |      |     |     |     |        |       |                   |                               |          |
|-----------------------------------------------------|------|-----|-----|-----|--------|-------|-------------------|-------------------------------|----------|
| USA, wells.<br>(Th, Tp Klosterman,<br>1981a, 1981b) | 3.34 | 0.8 | 109 | 118 | 63-158 | early | 125 $\frac{i}{-}$ | 10 <sup>6</sup> $\frac{f}{-}$ | as above |
| (VRE-as above)                                      | 3.31 | 0.8 | 112 | 118 | 63-158 | early | 129 $\frac{i}{-}$ | 10 <sup>6</sup> $\frac{f}{-}$ | as above |

|                                                                                                                           |      |     |            |     |     |       |                   |                               |          |
|---------------------------------------------------------------------------------------------------------------------------|------|-----|------------|-----|-----|-------|-------------------|-------------------------------|----------|
| Arkansas, USA,<br>wildcat well.<br>(Th-Moore and<br>Druckman, 1981)<br>(Tp-Klosterman,<br>1981a, 1981b)<br>(VRE-as above) | 2.41 | 0.6 | <u>102</u> | N/A | N/A | early | 102 $\frac{i}{-}$ | 10 <sup>6</sup> $\frac{f}{-}$ | as above |
|---------------------------------------------------------------------------------------------------------------------------|------|-----|------------|-----|-----|-------|-------------------|-------------------------------|----------|

## **Smackover Formation**

### **Texas, Arkansas, and**

### **Mississippi, USA,**

(Th-O'Hearn, 1984)

(VRE, as above)

(Tp-Nunn, 1984)

### **Well names:**

|                      |     |      |     |     |         |       |                   |                                 |                              |
|----------------------|-----|------|-----|-----|---------|-------|-------------------|---------------------------------|------------------------------|
| Murphy 1 Giffco      | 2.4 | 0.5  | 98  | 100 | 69-130  | early | 99 $\frac{h}{-}$  | 2x10 <sup>7</sup> $\frac{f}{-}$ | Primaries/<br>calcite cement |
| Lear 1 Clements      | 3.3 | 0.7  | 128 | 130 | 97-150  | early | 128 $\frac{h}{-}$ | 2x10 <sup>7</sup> $\frac{f}{-}$ | as above                     |
| Aminoil 2 Dixon      | 3.4 | 0.75 | 108 | 120 | 90-125  | early | 133 $\frac{h}{-}$ | 2x10 <sup>7</sup> $\frac{f}{-}$ | as above                     |
| Murphy 1 IPC         | 2.5 | 0.55 | 103 | 120 | 83-121  | early | 105 $\frac{h}{-}$ | 2x10 <sup>7</sup> $\frac{f}{-}$ | as above                     |
| Pennzoil 1 Taylor    | 3.3 | 0.7  | 128 | 125 | 111-158 | early | 123 $\frac{h}{-}$ | 2x10 <sup>7</sup> $\frac{f}{-}$ | as above                     |
| Texaco 1 Newsome     | 3.5 | 0.8  | 120 | 125 | 88-146  | early | 133 $\frac{h}{-}$ | 3x10 <sup>7</sup> $\frac{f}{-}$ | as above                     |
| Humble 1 Newsome     | 4.0 | 0.9  | 139 | 142 | 128-147 | early | 143 $\frac{h}{-}$ | 3x10 <sup>7</sup> $\frac{f}{-}$ | as above                     |
| Phillips 1 Josephine | 5.9 | 1.8  | 129 | 130 | 122-148 | early | 179 $\frac{h}{-}$ | 3x10 <sup>7</sup> $\frac{f}{-}$ | as above                     |

| Locality, Country,<br>Description<br>(Reference)                             | Depth<br>(km) | Rm<br>mean<br>(%) | Th<br>mean<br>(°C) | Th<br>mode<br>(°C) | Th<br>range<br>low/high<br>(°C) | Timing of<br>Inclusions<br>Relative<br>to Tpeak | Present<br>T if at<br>Tpeak<br>(°C) | Functional<br>Heating<br>Duration<br>(yr) | Inclusion<br>Petrography<br>/<br>Host Mineral                     |
|------------------------------------------------------------------------------|---------------|-------------------|--------------------|--------------------|---------------------------------|-------------------------------------------------|-------------------------------------|-------------------------------------------|-------------------------------------------------------------------|
| <b>Central Graben,<br/>Denmark, Oil Fields</b>                               |               |                   |                    |                    |                                 |                                                 |                                     |                                           |                                                                   |
| (Th-Jensenius<br>and Monksgard, 1989)<br>(Rm-Thomsen et al.<br>1983, fig. 2) |               |                   |                    |                    |                                 |                                                 |                                     |                                           |                                                                   |
| <u>Oil field names:</u>                                                      |               |                   |                    |                    |                                 |                                                 |                                     |                                           | Various origins/<br>calcite cement                                |
| North Arne                                                                   | 2.23          | 0.55              | 85                 | 85                 | 70-110                          | early                                           | 95                                  | $3 \times 10^6 \frac{f}{f}$               | as above                                                          |
| Skjold                                                                       | 1.6           | 0.5               | 78                 | 80                 | 50-110                          | early                                           | 82                                  | $3 \times 10^6 \frac{f}{f}$               | as above                                                          |
| East Rosa                                                                    | 1.5           | 0.45              | 72                 | 70                 | 60-100                          | early                                           | 72                                  | $3 \times 10^6 \frac{f}{f}$               | as above                                                          |
| Rolf                                                                         | 1.9           | 0.5               | 83                 | 80                 | 50-110                          | early                                           | 96                                  | $3 \times 10^6 \frac{f}{f}$               | as above                                                          |
| Nils                                                                         | 1.9           | 0.5               | 72                 | 80                 | 60-100                          | early                                           | 68                                  | $3 \times 10^6 \frac{f}{f}$               | as above                                                          |
| Vagn                                                                         | 1.54          | 0.45              | 75                 | 80                 | 60-105                          | early                                           | 65                                  | $3 \times 10^6 \frac{f}{f}$               | as above                                                          |
| <b>Bornholm, Denmark</b>                                                     |               |                   |                    |                    |                                 |                                                 |                                     |                                           |                                                                   |
| <b>Outcrop.</b><br>(Th-Jensenius,<br>1987)<br>(Rm-Thomsen et al.,<br>1983)   |               |                   |                    |                    |                                 |                                                 |                                     |                                           |                                                                   |
|                                                                              | 0             | 2.25              | 136                | 200 <sup>d</sup>   | 105-210                         | early                                           | --                                  | $10^6 \frac{f}{f}$                        | Various origins/<br>calcite vein                                  |
| <b>Denmark onshore,</b>                                                      |               |                   |                    |                    |                                 |                                                 |                                     |                                           |                                                                   |
| <b>Wells. Orslev-1</b>                                                       |               |                   |                    |                    |                                 |                                                 |                                     |                                           |                                                                   |
|                                                                              | 2.1           | 0.65              | 80?                | 87                 | 63-98                           | unknown                                         | --                                  | --                                        | Primaries only                                                    |
| Novling-1                                                                    |               |                   |                    |                    |                                 |                                                 |                                     |                                           |                                                                   |
|                                                                              | 3.5           | 0.8               | 80?                | 90                 | 63-103                          | unknown                                         | --                                  | --                                        | Secondaries<br>both in calcite<br>veins                           |
| (Th, Rm-as above)                                                            |               |                   |                    |                    |                                 |                                                 |                                     |                                           |                                                                   |
| <b>Maracaibo Basin,<br/>Venezuela, well.</b>                                 |               |                   |                    |                    |                                 |                                                 |                                     |                                           |                                                                   |
|                                                                              | 2.73          | --                | 84 <sup>m</sup>    | 112                | 50-130                          | at peak                                         | 157 <sup>l</sup>                    | $10^6 \frac{f}{f}$                        | Primaries only/<br>calcite veins                                  |
| (Visser, 1982)                                                               |               |                   |                    |                    |                                 |                                                 |                                     |                                           |                                                                   |
| <b>Haltenbanken, North<br/>Sea, Norway, well,<br/>Jurassic rocks.</b>        |               |                   |                    |                    |                                 |                                                 |                                     |                                           |                                                                   |
|                                                                              | 1.68          | 0.4               | <u>66</u>          | N/A                | 56-68                           | at peak?                                        | 68 <sup>h</sup>                     | $10^6 \frac{f}{f}$                        | Various origins/<br>calcite cement                                |
| (Th-Saigal and<br>Bjorlykke, 1987)<br>(Rm-Hvoslef et al.<br>1988)            |               |                   |                    |                    |                                 |                                                 |                                     |                                           |                                                                   |
| <b>North Coles Levee<br/>field, USA, wells.</b>                              |               |                   |                    |                    |                                 |                                                 |                                     |                                           |                                                                   |
|                                                                              | 2.73          | 0.5               | <u>59</u>          | N/A                | 57-62                           | early                                           | 107 <sup>j</sup>                    | $10^6 \frac{f}{f}$                        | "Very small"<br>inclusions-<br>Various origins/<br>calcite cement |
| (Th-Boles, 1987)<br>(Rm-Boles and<br>Ramseyer, 1988)                         |               |                   |                    |                    |                                 |                                                 |                                     |                                           |                                                                   |

| Locality, Country,<br>Description<br>(Reference)                                                 | Depth<br>(km) | Rm<br>mean<br>(%)         | Th<br>mean<br>(°C) | Th<br>mode<br>(°C) | Th<br>range<br>low/high<br>(°C) | Timing of<br>Inclusions<br>Relative<br>to Tpeak | Present<br>T if at<br>Tpeak<br>(°C) | Functional<br>Heating<br>Duration<br>(yr) | Inclusion<br>Petrography<br>/<br>Host Mineral |
|--------------------------------------------------------------------------------------------------|---------------|---------------------------|--------------------|--------------------|---------------------------------|-------------------------------------------------|-------------------------------------|-------------------------------------------|-----------------------------------------------|
| Fateh Field, Dubai<br>wells.<br>(Horsfield and<br>McLimans, 1984;<br>Videtich et al.,<br>1988)   | 2.7           | 0.9                       | 85                 | 98 <sup>d</sup>    | 52-135                          | early                                           | 115 <sup>i</sup>                    | 5x10 <sup>6</sup> <sup>f</sup>            | Primaries/<br>late blocky<br>calcite spar     |
| Winterburn Basin,<br>Canada, well LSD-10<br><br>(Nahnybida et al.,<br>1982)                      | 2.3           | 1.0                       | 144                | 150                | 90-200                          | at peak?                                        | 128 <sup>h</sup>                    | 10 <sup>6</sup> ? <sup>f</sup>            | Primaries?/<br>calcite cement                 |
| Cottonwood Wash, Utah,<br>USA outcrop,<br>(Meunier et al.,<br>1987)                              | 0             | 0.6 <sup>p</sup><br>(VRE) | 95                 | 107                | 70-195                          | early to<br>at peak                             | --                                  | 10 <sup>6</sup> <sup>f</sup>              | Various origins/<br>calcite                   |
| Paradox basin, USA,<br>outcrop.<br>(Th-Morrison<br>and Parry, 1986)<br>(Rm-Hite et al.,<br>1984) | 0             | 0.65                      | 93                 | 98                 | 44-122                          | at peak                                         | --                                  | 10 <sup>6</sup> <sup>f</sup>              | Various origins/<br>calcite vein              |
| Denver Basin,<br>well Berthoud-4, USA<br>(Crysdale and<br>Barker, 1988)                          | 0.91          | 0.6                       | 92                 | 93                 | 65-95                           | early?                                          | --                                  | 10 <sup>6</sup> <sup>f</sup>              | Various origins/<br>calcite cement            |

| Locality, Country,<br>Description<br>(Reference) | Depth<br>(km) | Rm<br>mean<br>(%)         | Th<br>mean<br>(°C) | Th<br>mode<br>(°C) | Th<br>range<br>low/high<br>(°C) | Timing of<br>Inclusions<br>Relative<br>to Tpeak | Present<br>T if at<br>Tpeak<br>(°C) | Functional<br>Heating<br>Duration<br>(yr) | Inclusion<br>Petrography<br>/<br>Host Mineral |
|--------------------------------------------------|---------------|---------------------------|--------------------|--------------------|---------------------------------|-------------------------------------------------|-------------------------------------|-------------------------------------------|-----------------------------------------------|
| <b>North Sea, U.K.,<br/>Tartan Field</b>         |               |                           |                    |                    |                                 |                                                 |                                     |                                           |                                               |
| (Th-Burley et al.,<br>1989)                      |               |                           |                    |                    |                                 |                                                 |                                     |                                           |                                               |
| (Rm-Bissada, 1983)                               |               |                           |                    |                    |                                 |                                                 |                                     |                                           |                                               |
| Dowthrown Block                                  | 3.7           | 0.7                       | N/A                | 105                | 88-110                          | early                                           | --                                  | $4 \times 10^7 \frac{f}{f}$               | Various origins/<br>calcite cement            |
| Upthrown Block                                   | 3.2           | N/A                       | 105?               | 118?               | 85-118 (n=3)                    | early                                           | --                                  | $4 \times 10^7 \frac{f}{f}$               | as above                                      |
| <b>Great Oolite</b>                              |               |                           |                    |                    |                                 |                                                 |                                     |                                           |                                               |
| <b>Humbley Grove, U.K.</b>                       | 1.5           | 0.55                      | 60?                | 65                 | 53-85                           | early or<br>at peak                             | --                                  | $3 \times 10^7 \frac{f}{f}$               | Various origins/<br>calcite cement            |
| (Sellwood et al.<br>1989)                        |               |                           |                    |                    |                                 |                                                 |                                     |                                           |                                               |
| <b>Great Oolite</b>                              |               |                           |                    |                    |                                 |                                                 |                                     |                                           |                                               |
| <b>Storrington/<br/>Southwater wells, U.K.</b>   | 2.6           | 0.7<br>(VRE)              | N/A                | 90                 | 70-95                           | early or<br>at peak                             | --                                  | $10^7 \frac{f}{f}$                        | Primaries/<br>calcite cement                  |
| (McLimans<br>and Videtich, 1989)                 |               |                           |                    |                    |                                 |                                                 |                                     |                                           |                                               |
| <b>Lodeve Basin,<br/>France. Outcrop</b>         |               |                           |                    |                    |                                 |                                                 |                                     |                                           |                                               |
| (Landaïs and<br>Connan, 1986)                    | 0             | 0.85                      | N/A                | 135?               | 80-150                          | at peak                                         | --                                  | --                                        | Various origins/<br>calcite cement            |
| <b>Guadalupe Mountains,<br/>outcrop, USA</b>     |               |                           |                    |                    |                                 |                                                 |                                     |                                           |                                               |
| (Th-Crysdale, 1987)                              | 0             | 0.5<br>$0.4? \frac{k}{k}$ | 72                 | 77                 | 48-100                          | at peak?                                        | --                                  | $10^6 \frac{f}{f}$                        | Primaries/<br>calcite cement                  |
| (Rm-this paper)                                  |               |                           |                    |                    |                                 |                                                 |                                     |                                           |                                               |
| <b>Northwest Kansas, USA,<br/>wells.</b>         |               |                           |                    |                    |                                 |                                                 |                                     |                                           |                                               |
| (Th-Anderson, 1989)                              |               |                           |                    |                    |                                 |                                                 |                                     |                                           |                                               |
| (Rm-this paper)                                  |               |                           |                    |                    |                                 |                                                 |                                     |                                           |                                               |
| <u>Well names:</u>                               |               |                           |                    |                    |                                 |                                                 |                                     |                                           |                                               |
| Cities 1 Knudsen                                 | 1.29          | 0.9                       | 148                | 160 $\frac{d}{d}$  | 90-210                          | early                                           | --                                  | $10^6? \frac{f}{f}$                       | Primaries/<br>calcite cement                  |
| Gore 1 Denny                                     | 1.24          | 0.7                       | 87                 | 93 $\frac{d}{d}$   | 50-100                          | early                                           | --                                  | $10^6? \frac{f}{f}$                       | as above                                      |
| Murfin 2 Elvin                                   | 1.12          | 0.9                       | 59                 | 73 $\frac{d}{d}$   | 45-85                           | early                                           | --                                  | $10^6? \frac{f}{f}$                       | as above                                      |
| <b>Sacramento Mountains,<br/>USA, outcrop.</b>   |               |                           |                    |                    |                                 |                                                 |                                     |                                           |                                               |
| (data this paper)                                |               |                           |                    |                    |                                 |                                                 |                                     |                                           |                                               |
| <u>Sample numbers:</u>                           |               |                           |                    |                    |                                 |                                                 |                                     |                                           |                                               |
| 225a-b                                           | 0             | 0.4 $\frac{k}{k}$         | 101                | 95                 | 43-150                          | early                                           | --                                  | $10^6? \frac{f}{f}$                       | Primaries/<br>calcite cement                  |
| 281a and 281b                                    | 0             | 1.2 $\frac{k}{k}$         | 97                 | 100                | 74-108                          | early                                           | --                                  | $10^6? \frac{f}{f}$                       | as above                                      |
| 282-a                                            | 0             | 0.4 $\frac{k}{k}$         | 93                 | 120                | 60->200                         | early                                           | --                                  | $10^6? \frac{f}{f}$                       | as above                                      |
| 283-a                                            | 0             | 0.4 $\frac{k}{k}$         | 74                 | 75                 | 47-160                          | early                                           | --                                  | $10^6? \frac{f}{f}$                       | as above                                      |

---

### Notes

Abbreviations: Rm, mean random vitrinite reflectance; VRE, Vitrinite reflectance equivalent estimated from regional curves or other measured thermal maturity parameters; Th, homogenization temperature, mean or mode value as indicated; n=sample size, noted only if small. Tpeak is the peak temperature reached in a system. Tp, is the present temperature in the system. Functional heating duration is the time elapsed while temperature increases within 15°C of peak temperature. N/A means not available. -- indicates not applicable. An underlined mean Th value indicates that the modal Th value was not available and the mean value was used in figure 2 and to compute the regression equation. A question mark infers some uncertainty in the determination or measurement.

Compilation Notes: a, The term, primaries, refers to fluid inclusions petrographically recognized to have formed during crystal growth; b, fluid inclusions appear to have formed near peak temperature; c, heating is related to an igneous intrusion, which usually cool in less than 1 m.y.; d, used highest substantial mode (numerous measurements) in polymodal Th distributions; e, fluid inclusions appear to have formed before peak temperature; f, heating duration estimated from residence time within 15°C of peak temperature; g, heating duration estimate from Barker (1983); h, corrected using American Association of Petroleum Geologists (1976) method; i, reconstructed from geothermal gradient and mean surface temperature; j, well temperature after equilibration in the well was allowed; k, weathered sample; l, reported temperature (corrected); m, considered data only from the primary fluid inclusions; n, average or interpolation from adjacent samples; o, Rm from nearby well that has a similar temperature-depth profile and mineral assemblage changes with depth; p, Rm estimated from an H/C ratio of 0.9 in associated organic matter; q, pressure correction removed from data reported as Th.

---

### REFERENCES CITED

- American Association of Petroleum Geologists, 1976, Basic data file from A.A.P.G. Geothermal Survey of North America. University of Oklahoma, Norman, Oklahoma.
- Anderson, J.E., 1989, Diagenesis of the Lansing and Kansas City Groups (Upper Pennsylvanian) northwestern Kansas and southwestern Nebraska. University of Kansas, M.S. thesis, 259 p.
- Barker, C.E., 1979, Vitrinite reflectance geothermometry in the Cerro Prieto geothermal field, Baja California, Mexico: University of California, Riverside, Institute of Geophysics and Planetary Physics, Report 79/10, 105p.
- Barker, C.E., 1983, The influence of time on metamorphism of sedimentary organic matter in selected geothermal systems, western North America: *Geology*, v. 11, p. 384-388.
- Barker, C.E., 1989a, Temperature and time in the thermal maturation of sedimentary organic matter. in Naeser, N.D., and McCulloch, Thane, eds., *Thermal History of Basins: Methods and Case Histories*, Springer-Verlag, Berlin. p. 73-98.
- Barker, C.E., 1989b, Geothermics applied to the reconstruction of subsurface temperatures: U.S. Geological Survey Bulletin 1912. p. 36-42.
- Bissada, K.K., 1983, Petroleum generation in Mesozoic sediments of the Moray Firth Basin, British North Sea: *Advances in Organic Geochemistry 1981*, J. Wiley, New York, p. 7-15
- Blake, M.C., et al., 1988, Metamorphic and tectonic evolution of the Franciscan Complex, Northern California, in Ernst, W.G., ed., *Metamorphism and Crustal Evolution of the Western United States*, Ruby volume 7, p. 1036-1060. Prentice Hall, Englewood Cliffs.

- Boles, J.R., 1987, Six million year diagenetic history, North Coles Levee, San Joaquin Basin, California, in Marshall, J.D., ed., Diagenesis of Sedimentary Sequences, Geological Society Special Publication 36, p. 313-324.
- Boles, J.R., and Ramseyer, K., 1988, Albitization and vitrinite reflectance as paleothermal indicators, San Joaquin Basin, in Graham, S.A., ed., Studies of the Geology of the San Joaquin Basin. Pacific Section, Society of Economic Paleontologists and Mineralogists, vol. 60, p. 129-139.
- Browne, P.R.L., 1977, Occurrence and hydrothermal alteration of diabase, Heber geothermal field, Imperial County, California. University of California, Riverside, Institute of Geophysics and Planetary Physics, Report 77/9, 61 p.
- Burley, S.D., Mullis, J., and Matter, A., 1989, Timing diagenesis in the Tartan Reservoir (UK North Sea): constraints from combined cathodoluminescence microscopy and fluid inclusion studies: Marine and Petroleum Geology, v. 6, p. 98-120.
- Bustin, R.M., Cameron, A.R., Grieve, D.A., and Kalkreuth, W.D., 1983, Coal Petrology its Principles, Methods, and Applications. Geological Association of Canada, Short Course Notes, v. 3, 230 p.
- Claypool, G.E., and Mancini, E.A., 1989, Geochemical relationships of petroleum in Mesozoic reservoirs to carbonate source rocks of Jurassic Smackover Formation, southwestern Alabama: American Association of Petroleum Geologists Bulletin, v. 73, p. 904-924.
- Crysdale B.L., 1987, Fluid inclusion evidence for the origin, diagenesis and thermal history of sparry calcite cement in the Capitan limestone, McKittrick Canyon, West Texas, University of Colorado, Boulder, MS Thesis, 78p.
- Crysdale, B.L., and Barker, C.E., 1988, Fluid inclusion and other evidence for the timing of fluid migration in the Niobrara Formation, Berthoud state 4 well Berthoud oil field, Denver basin, Colorado (abs.): Geological Society of America, Program with Abstracts, v. 20, no. 7, p. 228.
- Duba, Daria, and Williams-Jones, Anthony E., 1983, The application of illite crystallinity, organic matter reflectance, and isotopic techniques to mineral exploration: A case study in southwestern Gaspe, Quebec: Economic Geology, v. 78, p. 1350-1363.
- Elders W.A., et al., 1978, Petrology and light stable isotope geochemistry of 23 wells in the Cerro Prieto geothermal field, Baja California, Mexico: University of California, Riverside, Institute of Geophysics and Planetary Physics, Report 78/26, 274 p.
- Freckman, J.T., 1978, Fluid inclusion and oxygen isotope geothermometry of rock samples from Sinclair #4 and Elmore #1 boreholes, Salton Sea geothermal field, imperial Valley, California, U.S.A.: University of California, Riverside, Institute of Geophysics and Planetary Physics, Report 78/5, 66 p.
- Hite, R.J., Anders, D.E., and Ging, T.G., 1984, Organic-rich source orcks of Pennsylvanian age in the Paradox basin of Utah and Colorado, in Woodard, Jane, et al., eds., Hydrocarbon Source Rocks of the Greater Rocky Moutnian Region: Rocky Mountain Association of Geologists. p. 255-274.
- Hoagland, J.R., and Elders, W.A., 1977, The evolution of the East Mesa hydrothermal system, California, U.S.A.: University of California, Riverside, Institute of Geophysics and Planetary Physics, Report 77/2, 10 p.
- Horsfield, Brian, and McLimans, R.K., 1984, Geothermometry and geochemistry of aqueous and oil-bearing fluid inclusions from Fateh field, Dubai: Organic Geochemistry, v. 6, p. 733-740.

- Hvoslef, S., Larter, S.R., and Leythaeuser, D., 1988, Aspects of generation and migration of hydrocarbons from coal-bearing strata of the Hitra Formation, Haltenbanken area offshore Norway: *Organic Geochemistry*, v. 13, p. 525-536.
- Jensenius, Jorgen, 1987, Regional studies of fluid inclusions in Paleozoic sediments from southern Scandinavia: *Bulletin Geological Society of Denmark*, v. 36, p. 221-235.
- Jensenius, Jorgen, and Munksgaard, N.C., 1989, Large scale hot water migration systems around salt diapirs in the Danish Central Trough and their impact on diagenesis of calc reservoirs: *Geochimica et Cosmochimica acta*, v. 53, p. 79-88.
- Klosterman, M.J., 1981a, Applications of fluid inclusion techniques to burial diagenesis in carbonate rock sequences: *Applied Carbonate Research Program Technical Series Contribution 7*, 102 p.
- Klosterman, M.J., 1981b, Fluid inclusions in carbonate reservoir rock, Smackover Formation, (Upper Jurassic), southern Arkansas, USA (abst.) *Geological Association of Canada Abstracts*, v. 6, p. A-32.
- Landaï, Patrick, and Connan, Jacques, 1986, Source rock potential and oil generation in the uraniferous basin of Lodeve (Herault, France): *Sciences Geologiques bulletin*, v. 39, p. 293-314.
- Lawler, J.P., and Crawford, M.L., 1983, Stretching of fluid inclusions resulting from a low temperature microthermometric technique, *Economic Geology*, v. 78, p. 527-529.
- McLaughlin, R.J., et al., 1985, Paragenesis and tectonic significance of base and precious metal occurrences, along the San Andreas fault at Point Delgada, California: *Economic Geology*, v. 80, p. 344-359.
- McLimans, R.K., and Videtich, P.E., 1989, Diagenesis and burial history of Great Oolite Limestone, southern England: *American Association of Petroleum Geologists Bulletin*, v. 73, p. 1195-1205.
- Meunier, J.D., et al., 1987, Oxidation reduction processes in the genesis of the uranium-vanadium tabular deposits of the Cottonwood Wash mining area (Utah, U.S.A.): Evidence from petrological study and organic matter analysis: *Bulletin Mineralogie*, v. 110, p. 145-156.
- Miller, K.R., 1980, Petrology, hydrothermal mineralogy, stable isotope geochemistry and fluid inclusion geothermometry of borehole Mesa 31-1, East Mesa geothermal field, Imperial Valley, California: University of California, Riverside, Institute of Geophysics and Planetary Physics, Report 80/1, 113 p.
- Moore, C.H., and Druckman, Yeheskeel, 1981, Burial and porosity evolution, upper Jurassic Smackover, Arkansas and Louisiana. *American Association of Petroleum Geologists Bulletin*, v. 65, p. 597-628.
- Morrison, S.J., and Parry, W.T., 1986, Formation of carbonate-sulfate veins associated with copper ore deposits from saline basin brines, Lisbon Valley, Utah: Fluid inclusion and isotopic evidence: *Economic Geology*, v. 81, p. 1853-1866.
- Nahnybida, Cynthia, Hutcheon, Ian, and Kirker, Jill, 1982, Diagenesis of the Nisku Formation and the origin of late-stage cements: *Canadian Mineralogist*, v. 20, p. 129-140.
- Nunn, J.A., 1984, Subsidence and temperature histories for Jurassic sediments in the Northern Gulf Coast: a thermal-mechanical model, in Ventress, W.P.S., et al., eds, *The Jurassic of the Gulf Rim*, GCSSEPM Foundation third annual Research Conference proceedings, p. 309-322.
- Nunn, J.A., and Sassen, R., 1986, The framework of hydrocarbon generation and migration, Gulf of Mexico Continental slope: *Transactions, Gulf Coast Association of Geological Societies*, 36th annual meeting, p. 257-262.

- Nwachukwu, S.O., 1975, Temperatures of formation of vein minerals in the southern portion of the Benue Trough, Nigeria: *Nigeria Journal of Mining and Geology*, v. 11, p. 45-55.
- Nwachukwu, J.I., 1985, Petroleum prospects of Benue Trough, Nigeria: *American Association of Petroleum Geologists*, v. 69, p. 601-609.
- O'Hearn T.C., 1984, Fluid inclusion study of diagenetic mineral phases, Upper Jurassic Smackover Formation, southwest Arkansas and northeast Texas: M.S. thesis, Louisiana State University, Baton Rouge, 190 p.
- Peter, J.M., and Scott, S.D., 1988, Mineralogy, composition, and fluid inclusion microthermometry of seafloor hydrothermal deposits in the southern trough of Guaymas Basin, Gulf of California: *Canadian Mineralogist*, v. 26, p. 567-587.
- Roedder, Edwin, 1984, Fluid Inclusions. *Mineralogical Society of America Reviews in Mineralogy*, v. 12, 644 p.
- Saigal, G.C., and Bjorlykke, K., 1987, Carbonate cements in clastic reservoir rocks from offshore Norway-Relationships between isotopic composition, textural development and burial depth, *in* Marshall, J.D., ed., *Diagenesis of sedimentary sequences*, Geological Society Special Publication 36, p. 313-324.
- Sanford, S.J., 1981, Dating thermal events by fission track annealing, Cerro Prieto Geothermal Field, Baja California, Mexico: University of California, Riverside, Institute of Geophysics and Planetary Physics, report 81/4, 104 p.
- Scott, G.N., 1982, Temperature equilibration in boreholes: A statistical approach: M.S. Thesis, University of Michigan, 63 p.
- Sellwood, B.W., Shepherd, T.J., Evans, M.R., and James, B., 1989, Origin of late cements in oolitic reservoir facies: a fluid inclusion and isotopic study: *Sedimentary Geology*, v. 61, p. 223-237.
- Shepard, T.J., Rankin, A.H., and Alderton, D.H.M., 1985, *A Practical Guide to Fluid Inclusion Studies*: Blackie, London. 239 p.
- Simpson, A., 1954, The Nigerian Coalfield. *Geological Survey of Nigeria Bulletin no. 24*, 85 p.
- Speczik, S., 1988, Relation of Permian base metal occurrences to the Variscan paleogeothermal field of the Fore-Sudetic Monocline (southwestern Poland), *in* Friedrich, G.H., and Herzig, P.M., eds., *Base Metal Sulfide Deposits*. Springer-Verlag, Berlin, p. 12-24.
- Speczik, S., and Kozlowski, A., 1987, Fluid inclusion study of epigenetic veinlets from the carboniferous rocks of the Fore-Sudetic Monocline (southwest Poland): *Chemical Geology*, v. 61, p. 287-298.
- Stach, E., Mackowsky, M.-Th., Teichmuller, M., Taylor, G.H., Chandra, D., and Teichmuller, R., 1982, *Stach's textbook of coal petrology*, Third edition: Gebruder Borntraeger, Berlin, 535 p.
- Sterner, S.M., 1985, Calcite precipitation and thermal evolution of the Cerro Prieto Geothermal system: A fluid inclusion and stable isotope study: M.S. thesis, Pennsylvania State University, 67 p.
- Thomsen, E., Lindgren, H., and Wrang, P., 1983, Investigation on the source rock potential of Denmark: *Geologie en Mijnbouw*, v. 62, p. 221-239.
- Videtic, P.E., McLimans, R.K., Watson, H.K.S., and Nagy, R.M., 1988, Depositional, diagenetic, thermal and maturation histories of Cretaceous Mishrif Formation, Fateh Field, Dubai: *American Association of Petroleum Geologists*, v. 72, p. 1143-1159.

Visser, Wiekert, 1982, Maximum diagenetic temperature in a petroleum source rock from Venezuela by fluid inclusion geothermometry. Chemical Geology, v. 37, p. 95-101.

#### Figure Captions for Supplementary Materials

Figure 1. Scatter Plot of functional heating duration versus vitrinite reflectance for contact metamorphism adjacent to igneous sheet intrusions, geothermal systems, and burial diagenesis. Plot uses data from this paper and Barker (1989a; tables 5.2,5.3,5.4). Time units given in seconds because this unit is used in kinetic equations, although the functional heating duration is measured in millions of years (m.y.) (conversion factor:  $3.15 \times 10^{13}$  sec = 1 m.y.).

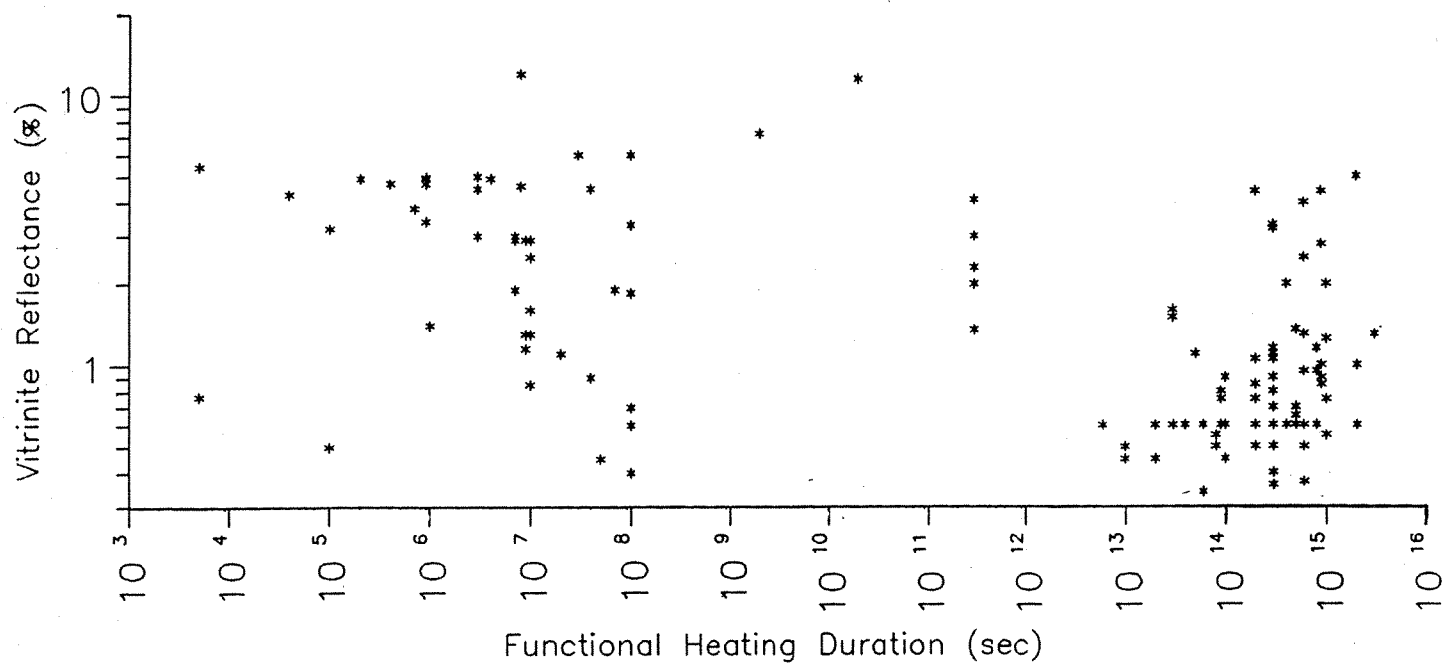

Barker - Goldstein Supplementary Fig.
